# Supplementary material for: Target engagement and immunogenicity of an active immunotherapeutic targeting pathological α-synuclein: a phase 1 placebo-controlled trial
Source: PubMed Central journal article supplement (PMC11405261; doi:10.1038/s41591-024-03101-8), 2024-06-20
Supplement: 41591_2024_3101_MOESM1_ESM.pdf [file 41591_2024_3101_MOESM1_ESM.pdf]

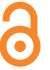

---

# Target engagement and immunogenicity of an active immunotherapeutic targeting pathological $\alpha$ -synuclein: a phase 1 placebo-controlled trial

---

In the format provided by the authors and unedited

---

## Supplementary material

### Table of contents

|                                                                                                                                                                                             |   |
|---------------------------------------------------------------------------------------------------------------------------------------------------------------------------------------------|---|
| <b>Supplementary Tables</b> .....                                                                                                                                                           | 2 |
| <b>Supplementary Table S1: Model-adjusted estimates of the mean differences between patients with and without CSF antibody titers in each item of the MDS-UPDRS part II score</b> .....     | 2 |
| <b>Supplementary Figures</b> .....                                                                                                                                                          | 3 |
| <b>Supplementary Figure S1: MoCA scores from baseline to Week 45 per treatment group</b> .....                                                                                              | 3 |
| <b>Supplementary Figure S2: MDS-UPDRS scores from baseline to Week 45 per treatment group</b> .....                                                                                         | 4 |
| <b>Supplementary Figure S3: Individual <math>\alpha</math>Syn aggregation curves in the <math>\alpha</math>Syn-SAA at baseline and EoS in the placebo group</b> .....                       | 5 |
| <b>Supplementary Figure S4: Individual <math>\alpha</math>Syn aggregation curves in the <math>\alpha</math>Syn-SAA at baseline and EoS in the 300/100/100 <math>\mu</math>g group</b> ..... | 6 |
| <b>Supplementary Figure S5: Individual <math>\alpha</math>Syn aggregation curves in the <math>\alpha</math>Syn-SAA at baseline and EoS in the 300/300/300 <math>\mu</math>g group</b> ..... | 7 |

## Supplementary Tables

**Supplementary Table S1: Model-adjusted estimates of the mean differences between patients with and without CSF antibody titers in each item of the MDS-UPDRS part II score**

| Item                                                                      | Estimate (95% CI)           |
|---------------------------------------------------------------------------|-----------------------------|
| Getting out of bed, getting out of a car, or standing up from a low chair | -0.62 (-1.15, -0.08)        |
| Speech                                                                    | -0.53 (-1.31, 0.24)         |
| Saliva and drooling                                                       | -0.51 (-1.48, 0.47)         |
| Walking and balance                                                       | -0.40 (-1.11, 0.30)         |
| Hygiene                                                                   | -0.28 (-0.62, 0.07)         |
| Hobbies and other activities                                              | -0.27 (-0.92, 0.38)         |
| Handwriting                                                               | -0.21 (-1.50, 1.09)         |
| Chewing and swallowing                                                    | -0.12 (-0.61, 0.37)         |
| Turning in bed                                                            | -0.08 (-0.73, 0.57)         |
| Getting dressed                                                           | -0.07 (-0.63, 0.48)         |
| Tremor                                                                    | 0.04 (-0.48, 0.57)          |
| Eating                                                                    | 0.11 (-0.53, 0.75)          |
| Freezing*                                                                 | NA                          |
| <b>MDS-UPDRS part II total</b>                                            | <b>-2.96 (-5.90, -0.01)</b> |

Estimates are adjusted mean differences in change from baseline to Week 45 between patients with (n=5) and without (n=13) detectable CSF antibody titers. The item showing the greatest difference in this change was “Getting out of bed, getting out of a car, or standing up from a low chair.” The model used MMRM to account for differences in the MDS-UPDRS part II between groups at baseline. Unadjusted changes from baseline in MDS-UPDRS part II total score are shown for patients with (n=5) and without (n=13) detectable CSF antibody titers in **Figure 3E**.

\*For “Freezing” all responses were 0 so no estimate could be made.

CI, confidence interval; CSF, cerebrospinal fluid; MDS-UPDRS, Movement Disorder Society- Unified Parkinson’s Disease Rating Scale; MMRM, Mixed Model Repeated Measures.

## Supplementary Figures

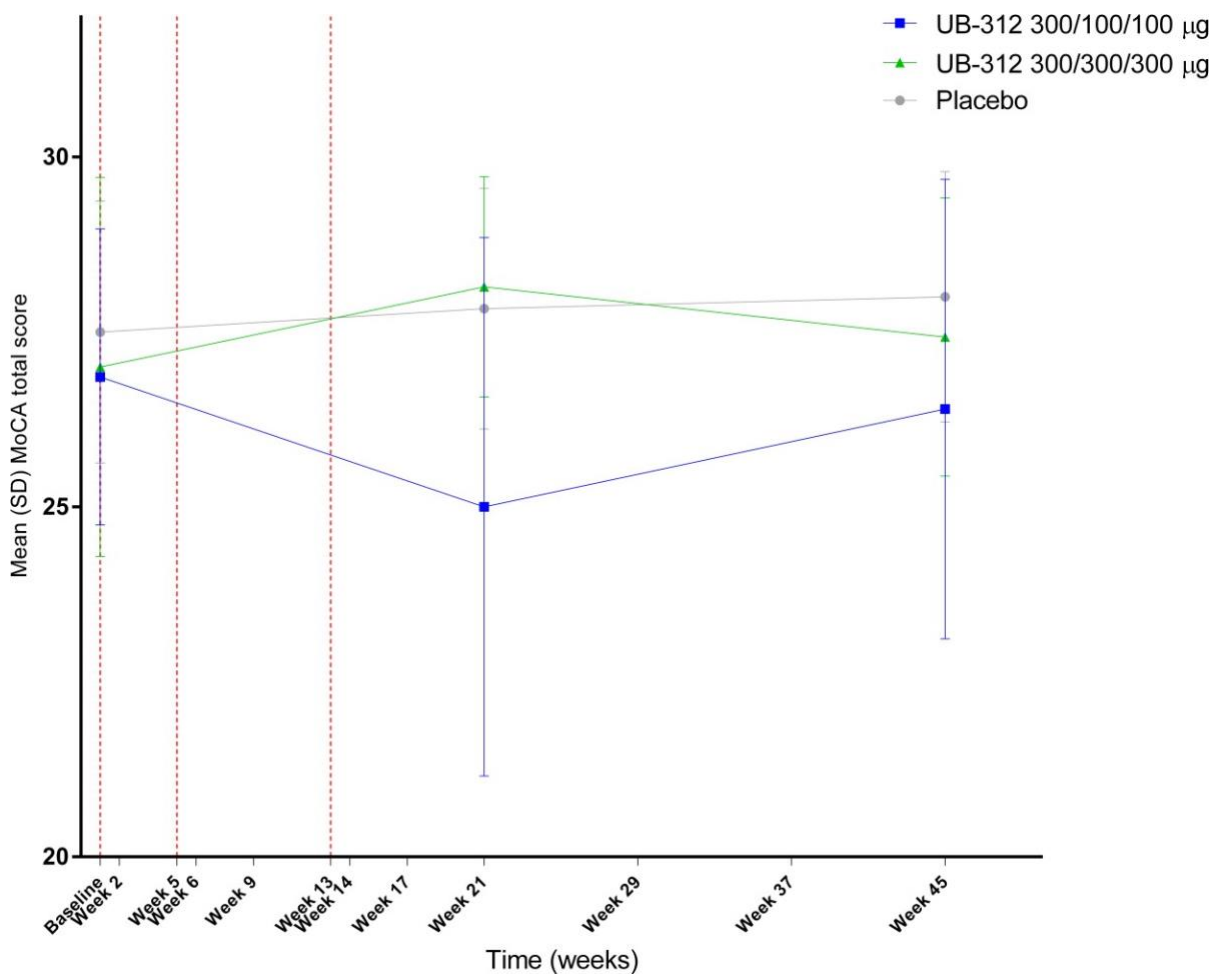

### Supplementary Figure S1: MoCA scores from baseline to Week 45 per treatment group

Symbols represent mean (SD) MoCA total scores for each group at each timepoint. Timing of the administration of UB-312 or placebo has been depicted as red dotted lines. Numbers per group; placebo, n=6; 300/100/100 µg, n=7 up to Week 13, n=6 up to Week 45, and n=5 at Week 45; 300/300/300 µg, n=7.

MoCA, Montreal Cognitive Assessment; SD, standard deviation.

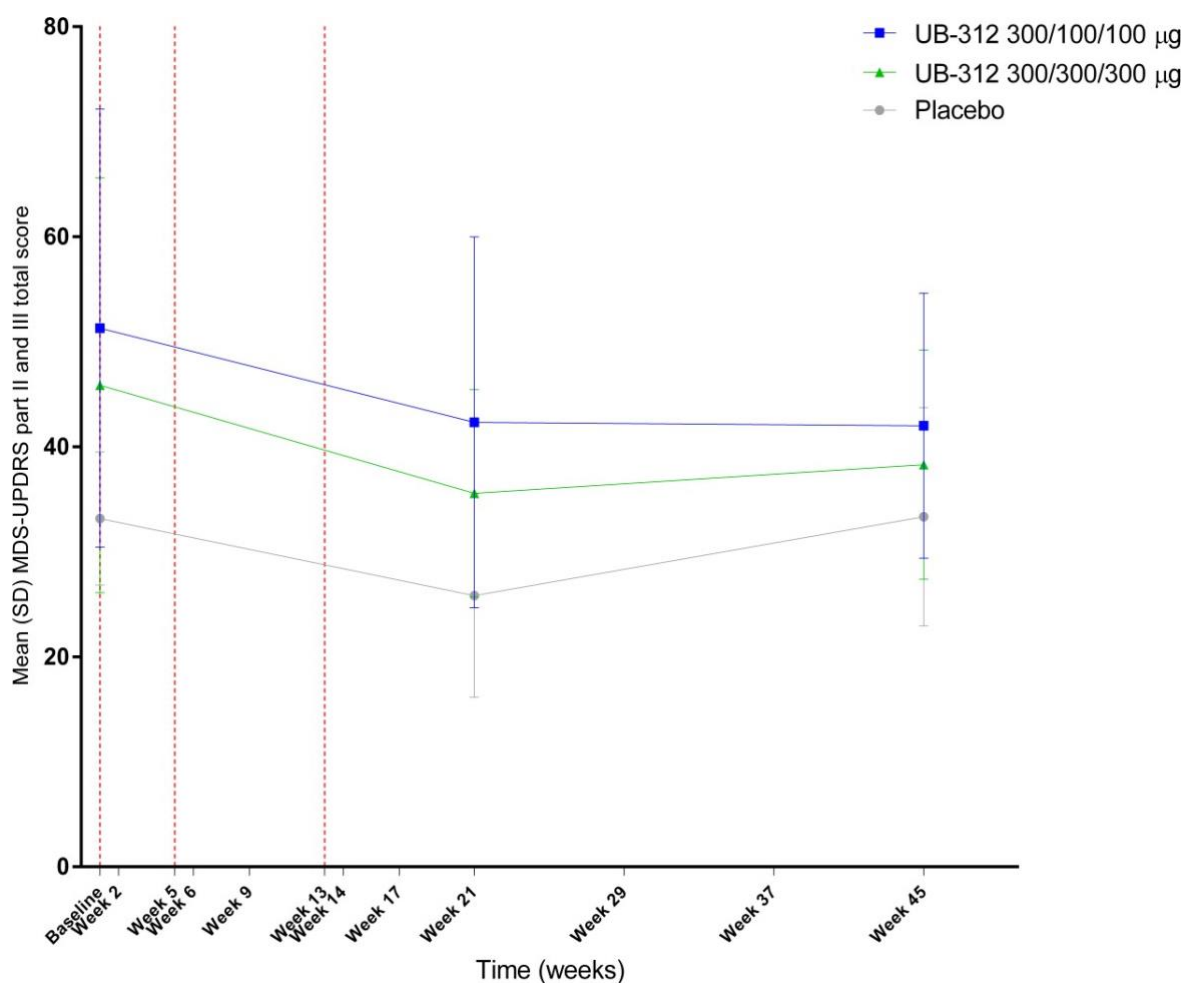

**Supplementary Figure S2: MDS-UPDRS scores from baseline to Week 45 per treatment group**

Symbols represent mean (SD) MDS-UPDRS part II and III total scores for each group at each timepoint. Timing of the administration of UB-312 or placebo has been depicted as red dotted lines. Numbers per group; placebo, n=6; 300/100/100 µg, n=7 up to Week 13, n=6 up to Week 45, and n=5 at Week 45; 300/300/300 µg, n=7.

MDS-UPDRS, Movement Disorder Society-Unified Parkinson's Disease Rating Scale; SD, standard deviation.

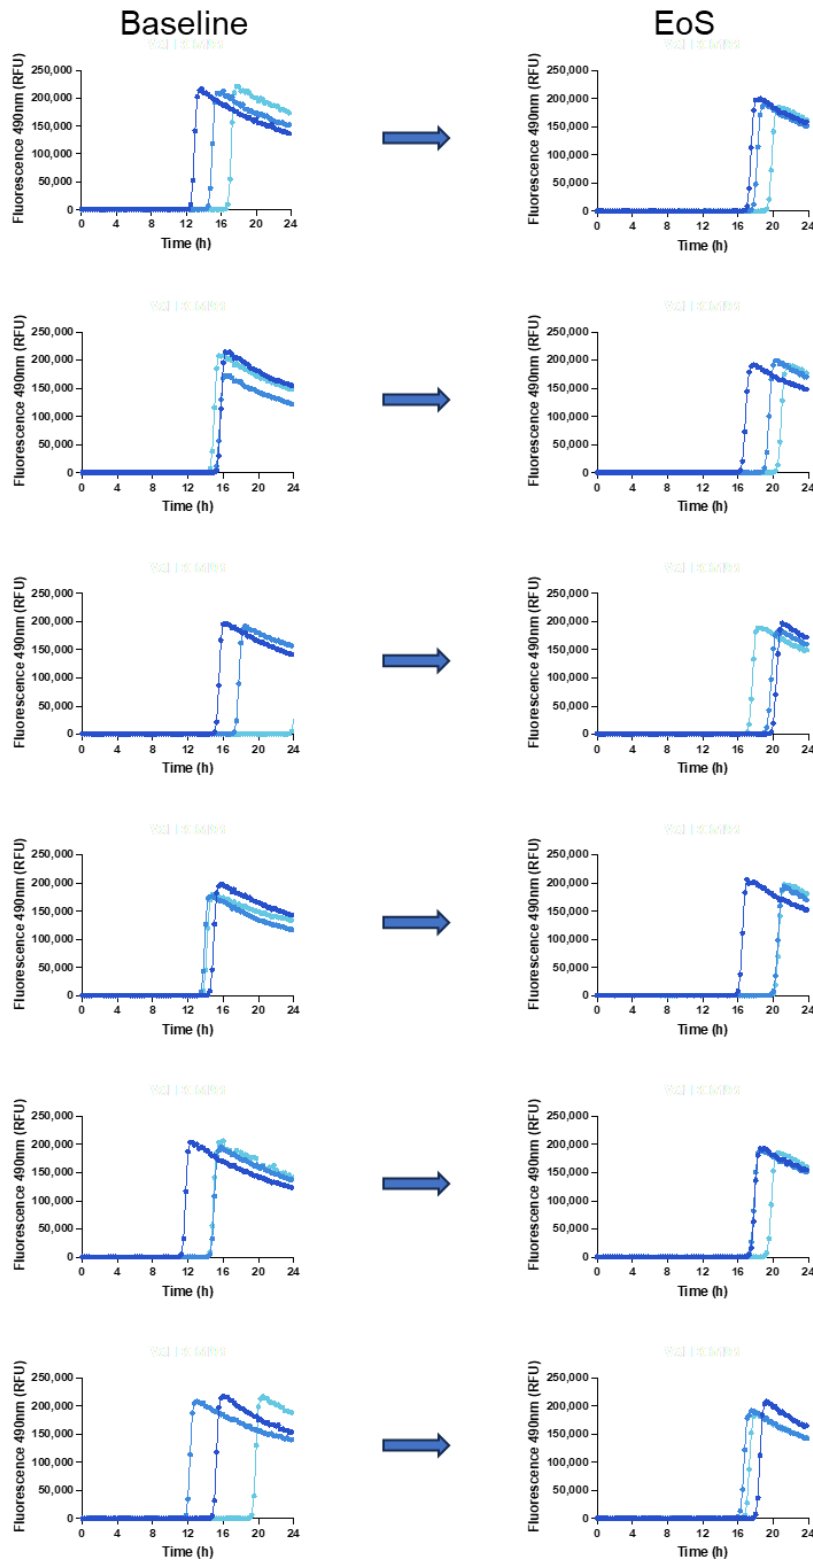

**Supplementary Figure S3: Individual  $\alpha$ Syn aggregation curves in the  $\alpha$ Syn-SAA at baseline and EoS in the placebo group**

Each graph represents the seeding kinetics of each triplicate from one CSF sample (i.e., one individual).

$\alpha$ Syn-SAA, alpha-synuclein seed amplification assay; CSF, cerebrospinal fluid; EoS, end of study

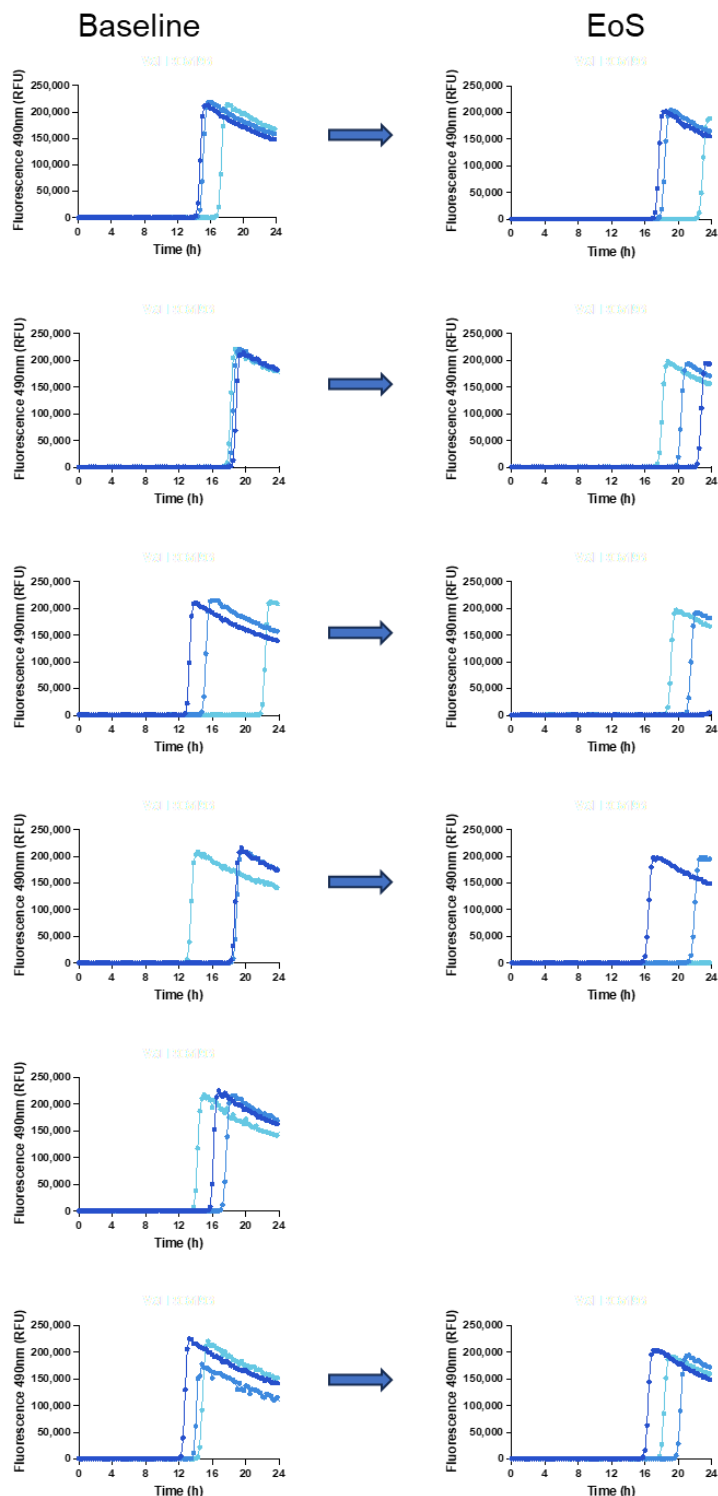

**Supplementary Figure S4: Individual  $\alpha$ Syn aggregation curves in the  $\alpha$ Syn-SAA at baseline and EoS in the 300/100/100  $\mu$ g group**

Each graph represents the seeding kinetics of each triplicate from one CSF sample (i.e., one individual). One patient with  $\alpha$ Syn-SAA positivity at baseline was no longer  $\alpha$ Syn-SAA positive at EoS.

$\alpha$ Syn-SAA, alpha-synuclein seed amplification assay; CSF, cerebrospinal fluid; EoS, end of study

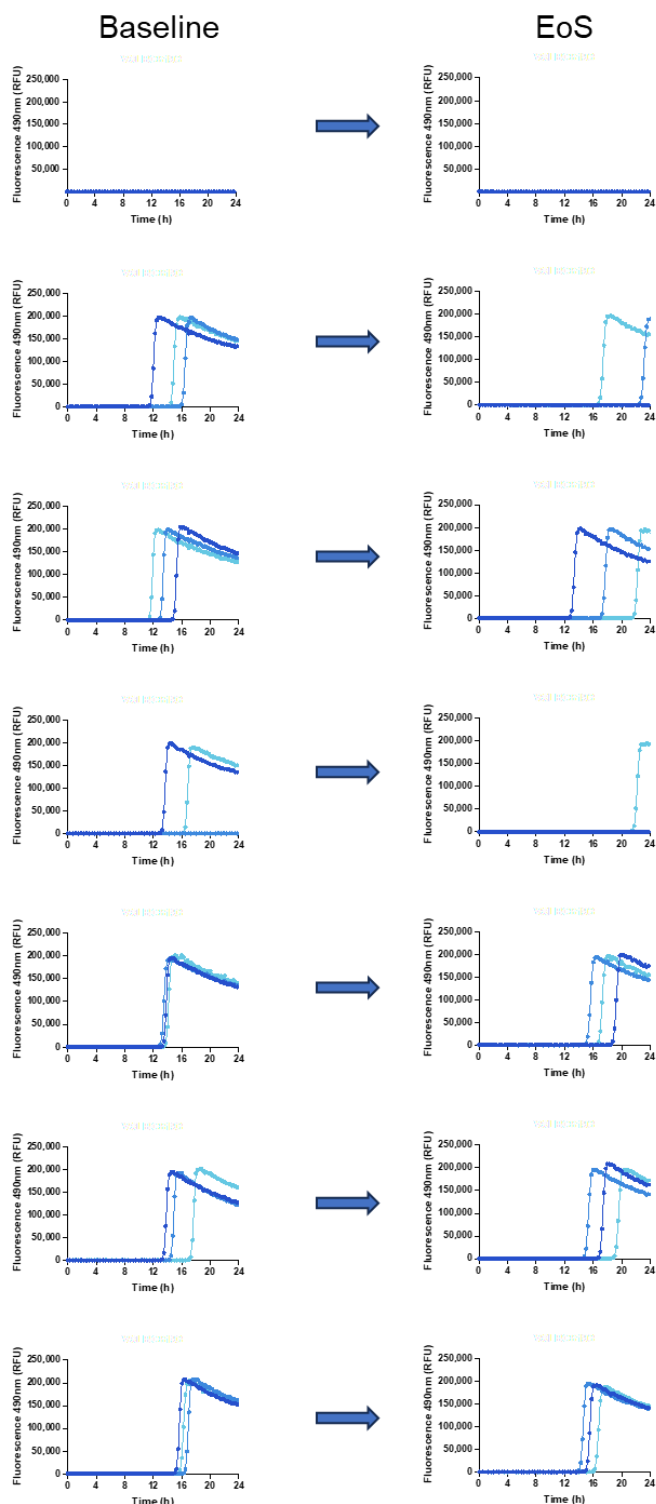

**Supplementary Figure S5: Individual  $\alpha$ Syn aggregation curves in the  $\alpha$ Syn-SAA at baseline and EoS in the 300/300/300  $\mu$ g group**

Note that one individual did not provide CSF at EoS and no data could be collected at that timepoint for this individual. Each graph represents the seeding kinetics of each triplicate from one CSF sample (i.e., one individual).

$\alpha$ Syn-SAA, alpha-synuclein seed amplification assay; CSF, cerebrospinal fluid; EoS, end of study
